# Supplementary material for: Isolable arene sandwiched copper(i) pyrazolates
Source: Royal Society of Chemistry journal article supplement (doi:10.1039/c5nj01002k), 2015-01-01
Supplement: c5nj01002k1.pdf [file c5nj01002k1.pdf]

# Isolable arene sandwiched copper(I) pyrazolates

Naleen B. Jayaratna, Champika V. Hettiarachchi, Muhammed Yousufuddin, and H. V. Rasika Dias\*

## Supporting Information

### General procedures

Solvents were purchased from commercial sources, dried with molecular sieves prior to use. NMR spectra were recorded on a JEOL Eclipse 500 spectrometer ( $^1\text{H}$ , 500.16 MHz;  $^{13}\text{C}$ , 125.77 MHz,  $^{19}\text{F}$ , 470.62). Proton and carbon chemical shifts are reported in ppm, and referenced using the residual proton or carbon signals of the deuterated solvent. Fluorine chemical shifts are reported in ppm, and referenced externally to a neat  $\text{CFCl}_3$ . Elemental analyses were performed at Intertek QTI laboratory (Whitehouse, NJ). Melting points were obtained on a Mel-Temp II apparatus. Naphthalene was purchased from Alfa Acer and used without further purification.  $\{[3,5\text{-(CF}_3)_2\text{Pz}]\text{Cu}\}_3 [\text{Cu}_3]$  was prepared as reported previously.<sup>1</sup>

(1) Dias, H. V. R.; Polach, S. A.; Wang, Z. *J. Fluor. Chem.* **2000**, *103*, 163-169.

$\{[\text{Bz}][\text{Cu}_3]_2\}_\infty$ :  $\{[3,5\text{-(CF}_3)_2\text{Pz}]\text{Cu}\}_3 [\text{Cu}_3]$  (100 mg, 0.125 mmol) was dissolved in 1 mL of benzene  $[\text{Bz}]$  and 0.5 mL of  $\text{CDCl}_3$  was added. The solution was kept at  $-20\text{ }^\circ\text{C}$  to obtain X-ray quality colorless crystals of  $\{[\text{Bz}][\text{Cu}_3]_2\}_\infty$ . Crystals were separated from mother liquor and immediately covered with a layer of hydrocarbon/Paratone-N oil and used for X-ray crystallography. Crystals used in NMR spectroscopy were dried under reduced pressure for about 30 mins at room temperature.  $^1\text{H}$  NMR ( $\text{CDCl}_3$ ):  $\delta$  (ppm) 7.03 (s), 7.36 (s).  $^{19}\text{F}$  NMR

(CDCl<sub>3</sub>):  $\delta$  (ppm) -61.0 (s). <sup>13</sup>C{<sup>1</sup>H} NMR (CDCl<sub>3</sub>):  $\delta$  (ppm) 104.5 (s, CH), 120.0 (q, <sup>1</sup>J(C,F) = 269.1 Hz, CF<sub>3</sub>), 128.5 (s, CH, C<sub>6</sub>H<sub>6</sub>), 144.6 (m, CCF<sub>3</sub>). <sup>1</sup>H NMR signal integration indicated the presence of 6.4% benzene in dried sample. Data from elemental analysis agree with the calculated values for [Cu<sub>3</sub>] containing traces of benzene. This observation is consistent with NMR data and indicates the loss of benzene under reduced pressure. Mp: 199-202 °C (decomposition). Anal. Calc. for {[Bz][Cu<sub>3</sub>]<sub>2</sub>]<sub>∞</sub>, C<sub>36</sub>H<sub>12</sub>N<sub>12</sub>Cu<sub>6</sub>F<sub>36</sub>: C, 25.77; H, 0.72; N, 10.02; Found: C, 22.45; H, 0.25; N, 10.56 (indicates the loss of most benzene and the presence of [Cu<sub>3</sub>] with about 6% benzene).

{[Mes][Cu<sub>3</sub>]<sub>∞</sub>: [Cu<sub>3</sub>] (100 mg, 0.125 mmol) was dissolved in 1 mL of mesitylene [Mes] and 4 mL of CDCl<sub>3</sub> was added. The solution was kept at -20 °C to obtain X-ray quality colorless crystals of {[Mes][Cu<sub>3</sub>]<sub>∞</sub>. Crystals were separated from mother liquor and immediately covered with a layer of hydrocarbon/Paratone-N oil and used for X-ray crystallography. Crystals used in NMR spectroscopy were air dried for few mins at room temperature. <sup>1</sup>H NMR (CDCl<sub>3</sub>):  $\delta$  (ppm) 2.27 (s), 6.80 (s), 7.02 (s). <sup>19</sup>F NMR (CDCl<sub>3</sub>):  $\delta$  (ppm) -61.0 (s). <sup>13</sup>C{<sup>1</sup>H} NMR (CDCl<sub>3</sub>):  $\delta$  (ppm) 104.5 (s, CH), 120.0 (q, <sup>1</sup>J(C,F) = 269.1 Hz, CF<sub>3</sub>), 127.06 (s, CH, C<sub>9</sub>H<sub>12</sub>), 137.92 (s, CCH<sub>3</sub>, C<sub>9</sub>H<sub>12</sub>), 144.6 (q, <sup>2</sup>J(C,F) = 38.0 Hz, CCF<sub>3</sub>). Anal. Calc. for C<sub>24</sub>H<sub>15</sub>N<sub>6</sub>Cu<sub>3</sub>F<sub>18</sub>: C, 31.33; H, 1.64; N, 9.13; Found: C, 32.07; H, 1.70; N, 9.35. M.p. of sample shows two melting temperature events, first partial melting at 126-130 °C and second melting process at 188-192 °C.

{[Nap][Cu<sub>3</sub>]<sub>∞</sub>: [Cu<sub>3</sub>] (200 mg, 0.25 mmol) and naphthalene [Nap] (32 mg, 0.25 mmol) were dissolved in 1.5 mL of benzene and 1.5 mL of CDCl<sub>3</sub> was added. The solution was kept at -20 °C to obtain X-ray quality colorless crystals of {[Nap][Cu<sub>3</sub>]<sub>∞</sub>. Crystals were separated from mother liquor and immediately covered with a layer of hydrocarbon/Paratone-N oil and used for

X-ray crystallography. Crystals used in NMR spectroscopy were dried under reduced pressure for 2 h at room temperature. Anal. Calc. for  $C_{25}H_{11}N_6Cu_3F_{18}$ : C, 32.36; H, 1.19; N, 9.06; Found: C, 31.88; H, 0.44; N, 9.49.  $^1H$  NMR ( $CDCl_3$ ):  $\delta$  (ppm) 7.02 (s), 7.40 (m), 7.76 (m).  $^{19}F$  NMR ( $CDCl_3$ ):  $\delta$  (ppm) -61.0 (s).  $^{13}C\{^1H\}$  NMR ( $CDCl_3$ ):  $\delta$  (ppm) 104.4 (s, CH), 120.0 (q,  $^1J(C,F) = 269.1$  Hz,  $CF_3$ ), 126.06 (s, CH, Nap), 128.0 (s, CH, Nap), 133.5 (s, C-CH, Nap), 144.4 (q,  $^2J(C,F) = 38.0$  Hz,  $CCF_3$ ).

**Photophysical measurements:** Steady state luminescence spectra were acquired using a Horiba J-Y Fluoromax 3 with upgrades for lifetime fluorescence studies. The excitation and emission spectra were corrected using factors supplied by the manufacturer. Solid samples were placed in a solid sample cell and covered with a quartz plate for measurements. Photophysical data of arene free  $[Cu_3]$  has been reported (see: H. V. R. Dias, H. V. K. Diyabalanage, M. G. Eldabaja, O. Elbjeirami, M. A. Rawashdeh-Omary and M. A. Omary, *J. Am. Chem. Soc.*, 2005, **127**, 7489-7501).

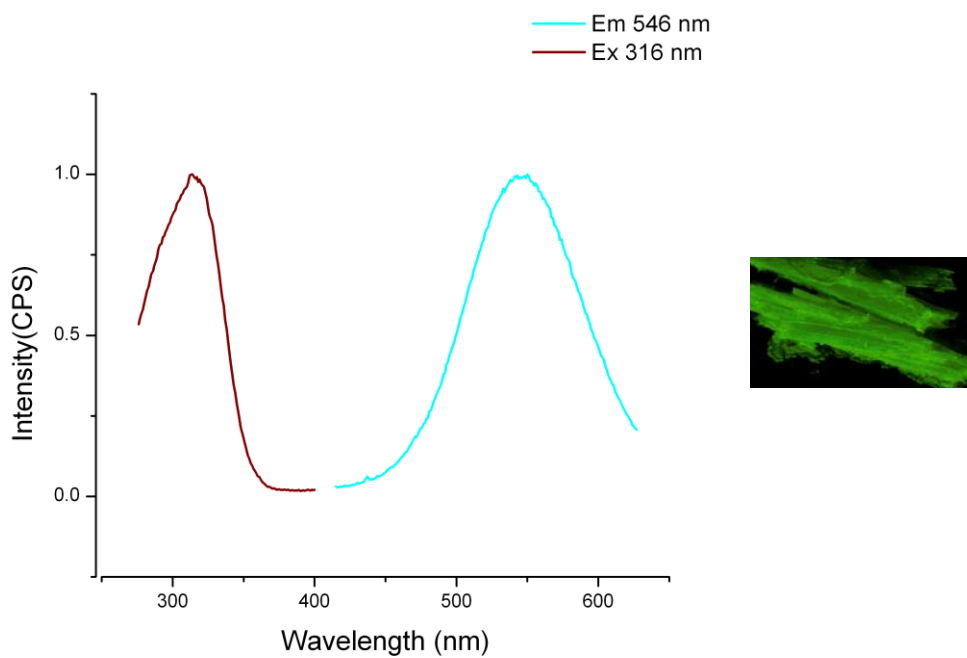

**Figure S1.** Photoluminescence emission and excitation spectra of  $\{[\text{Mes}][\text{Cu}_3]\}_\infty$

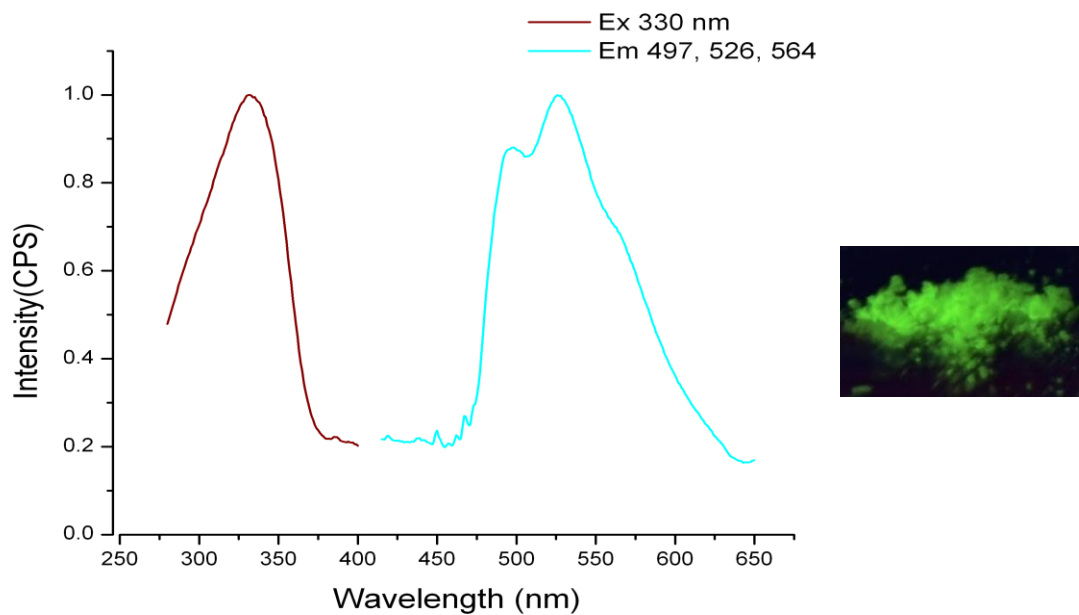

**Figure S2.** Photoluminescence emission and excitation spectra of  $\{[\text{Nap}][\text{Cu}_3]\}_\infty$

**X-ray crystallographic data:** A suitable crystal covered with a layer of hydrocarbon/paratone-N oil was selected and mounted on a Mitigen loop, and immediately placed in the low temperature nitrogen stream. The X-ray intensity data were measured on a Bruker D8 Quest with a Photon 100 CMOS detector equipped with an Oxford Cryosystems 700 series cooler, a Triumph monochromator, and a Mo K $\alpha$  fine-focus sealed tube ( $\lambda = 0.71073 \text{ \AA}$ ). Crystals of  $\{[\text{Nap}][\text{Cu}_3]\}_\infty$  appeared to crack at 100 K but diffraction pattern was satisfactory. Data were taken at a slightly higher temperature of 150(2) K for  $\{[\text{Bz}][\text{Cu}_3]_2\}_\infty$  and  $\{[\text{Mes}][\text{Cu}_3]\}_\infty$  to prevent crystal cracking upon cooling to 100 K. Intensity data were processed using the Saint Plus program. Initial calculations for the structure determination were carried out using the SHELXTL package (version 6.14) and finalized with Olex2 (version 1.2.5). Initial atomic positions were located by direct methods using XS, and the structures of the compounds were refined by the least-squares method using XL. Absorption corrections were applied by using SADABS. Hydrogen atoms were placed at calculated positions and refined riding on the corresponding carbons.

$\{[\text{Bz}][\text{Cu}_3]_2\}_\infty$  crystallizes in the P-1 space group with one Cu containing molecule and one half molecule of benzene in the asymmetric unit (for a Z value of 2). The center of the benzene molecule is located on an inversion center. Two CF<sub>3</sub> groups demonstrated rotational disorder. It was modeled and the atoms were treated with a combination of SADI, DELU, SIMU, and ISOR restraints as well as occupancy refinements. All the non-hydrogen atoms were refined anisotropically.

$\{[\text{Mes}][\text{Cu}_3]\}_\infty$  crystallizes in the R3c space group with one-third Cu molecule and one-third molecule of mesitylene in the asymmetric unit (for a Z value of 6). The centers of both molecules

are located at the convergence of three glide planes which effectively creates 3-fold rotational symmetry. All the non-hydrogen atoms were refined anisotropically.

$\{[\text{Nap}][\text{Cu}_3]\}_\infty$  crystallizes in the P-1 space group with one Cu molecule and two half molecules of naphthalene in the asymmetric unit (for a Z value of 2). The naphthalene molecules are located on an inversion center. One  $\text{CF}_3$  group demonstrated rotational disorder and was modeled successfully as well as occupancy refinement. All the non-hydrogen atoms were refined anisotropically.

Additional details are on the CIF files.

**Table S1.** Crystal data and structure refinement for  $\{[\text{Bz}][\text{Cu}_3]_2\}_\infty$ .

|                                               |                                                                   |
|-----------------------------------------------|-------------------------------------------------------------------|
| Empirical formula                             | $\text{C}_{36}\text{H}_{12}\text{Cu}_6\text{F}_{36}\text{N}_{12}$ |
| Formula weight                                | 1677.82                                                           |
| Temperature/K                                 | 150.03                                                            |
| Crystal system                                | triclinic                                                         |
| Space group                                   | P-1                                                               |
| a/Å                                           | 9.560(4)                                                          |
| b/Å                                           | 12.620(5)                                                         |
| c/Å                                           | 21.550(8)                                                         |
| $\alpha/^\circ$                               | 88.897(7)                                                         |
| $\beta/^\circ$                                | 84.185(7)                                                         |
| $\gamma/^\circ$                               | 87.425(7)                                                         |
| Volume/Å <sup>3</sup>                         | 2583.8(17)                                                        |
| Z                                             | 2                                                                 |
| $\rho_{\text{calc}}/\text{g}/\text{cm}^3$     | 2.157                                                             |
| $\mu/\text{mm}^{-1}$                          | 2.600                                                             |
| F(000)                                        | 1620.0                                                            |
| Crystal size/ $\text{mm}^3$                   | $0.387 \times 0.305 \times 0.116$                                 |
| Radiation                                     | MoK $\alpha$ ( $\lambda = 0.71073$ )                              |
| $2\Theta$ range for data collection/ $^\circ$ | 5.924 to 53.998                                                   |
| Index ranges                                  | $-12 \leq h \leq 12, -16 \leq k \leq 16, -27 \leq l \leq 27$      |

|                                                |                                                                   |
|------------------------------------------------|-------------------------------------------------------------------|
| Reflections collected                          | 28553                                                             |
| Independent reflections                        | 11227 [ $R_{\text{int}} = 0.0250$ , $R_{\text{sigma}} = 0.0327$ ] |
| Data/restraints/parameters                     | 11227/1122/867                                                    |
| Goodness-of-fit on $F^2$                       | 1.025                                                             |
| Final R indexes [ $I \geq 2\sigma(I)$ ]        | $R_1 = 0.0374$ , $wR_2 = 0.0968$                                  |
| Final R indexes [all data]                     | $R_1 = 0.0500$ , $wR_2 = 0.1056$                                  |
| Largest diff. peak/hole / $e \text{ \AA}^{-3}$ | 0.99/-0.58                                                        |

**Table S2.** Bond Lengths for  $\{[\text{Bz}][\text{Cu}_3]_2\}_\infty$ .

| Atom | Atom             | Length/ $\text{\AA}$ | Atom | Atom | Length/ $\text{\AA}$ |
|------|------------------|----------------------|------|------|----------------------|
| Cu1  | Cu2 <sup>1</sup> | 3.0309(11)           | Cu5  | N9   | 1.867(3)             |
| Cu1  | N1               | 1.872(3)             | Cu6  | N10  | 1.871(3)             |
| Cu1  | N6               | 1.870(3)             | Cu6  | N11  | 1.868(3)             |
| Cu2  | Cu1 <sup>1</sup> | 3.0310(11)           | F19  | C19  | 1.323(5)             |
| Cu2  | N2               | 1.866(3)             | F20  | C19  | 1.316(5)             |
| Cu2  | N3               | 1.871(3)             | F21  | C19  | 1.322(6)             |
| Cu3  | N4               | 1.871(3)             | F22  | C20  | 1.288(5)             |
| Cu3  | N5               | 1.874(3)             | F23  | C20  | 1.326(6)             |
| F1   | C4               | 1.336(5)             | F24  | C20  | 1.304(6)             |
| F2   | C4               | 1.326(6)             | F25  | C24  | 1.335(7)             |
| F3   | C4               | 1.314(5)             | F26  | C24  | 1.326(5)             |
| F4   | C5               | 1.332(5)             | F27  | C24  | 1.296(5)             |
| F5   | C5               | 1.310(5)             | F28  | C25  | 1.279(5)             |
| F6   | C5               | 1.332(5)             | F29  | C25  | 1.283(6)             |
| F7   | C9               | 1.445(10)            | F30  | C25  | 1.265(6)             |
| F8   | C9               | 1.354(11)            | F31  | C29  | 1.339(6)             |
| F9   | C9               | 1.084(10)            | F32  | C29  | 1.317(6)             |
| F10  | C10              | 1.266(7)             | F33  | C29  | 1.316(5)             |
| F11  | C10              | 1.325(8)             | F34  | C30  | 1.345(9)             |
| F12  | C10              | 1.229(8)             | F35  | C30  | 1.227(14)            |
| F13  | C14              | 1.320(5)             | F36  | C30  | 1.378(13)            |
| F14  | C14              | 1.334(6)             | N7   | N8   | 1.363(4)             |
| F15  | C14              | 1.308(5)             | N7   | C16  | 1.348(4)             |
| F16  | C15              | 1.304(5)             | N8   | C18  | 1.352(4)             |
| F17  | C15              | 1.304(5)             | N9   | N10  | 1.355(4)             |
| F18  | C15              | 1.298(5)             | N9   | C21  | 1.357(4)             |
| N1   | N2               | 1.363(4)             | N10  | C23  | 1.348(4)             |
| N1   | C1               | 1.351(4)             | N11  | N12  | 1.368(4)             |

|     |     |           |     |                  |           |
|-----|-----|-----------|-----|------------------|-----------|
| N2  | C3  | 1.349(4)  | N11 | C26              | 1.349(5)  |
| N3  | N4  | 1.365(4)  | N12 | C28              | 1.352(5)  |
| N3  | C6  | 1.340(5)  | C16 | C17              | 1.375(6)  |
| N4  | C8  | 1.350(5)  | C16 | C19              | 1.491(6)  |
| N5  | N6  | 1.358(4)  | C17 | C18              | 1.375(6)  |
| N5  | C11 | 1.347(4)  | C18 | C20              | 1.488(6)  |
| N6  | C13 | 1.353(4)  | C21 | C22              | 1.379(6)  |
| C1  | C2  | 1.382(6)  | C21 | C24              | 1.482(6)  |
| C1  | C4  | 1.482(6)  | C22 | C23              | 1.370(6)  |
| C2  | C3  | 1.363(6)  | C23 | C25              | 1.491(6)  |
| C3  | C5  | 1.495(6)  | C26 | C27              | 1.363(6)  |
| C6  | C7  | 1.381(7)  | C26 | C29              | 1.498(6)  |
| C6  | C9  | 1.491(6)  | C27 | C28              | 1.387(6)  |
| C7  | C8  | 1.383(6)  | C28 | C30              | 1.488(6)  |
| C8  | C10 | 1.485(7)  | C30 | F34A             | 1.238(14) |
| C9  | F7A | 1.166(11) | C30 | F35A             | 1.333(10) |
| C9  | F9A | 1.389(9)  | C30 | F36A             | 1.368(14) |
| C9  | F8A | 1.495(11) | C31 | C32              | 1.390(10) |
| C11 | C12 | 1.384(6)  | C31 | C33 <sup>2</sup> | 1.379(10) |
| C11 | C14 | 1.485(6)  | C32 | C33              | 1.369(9)  |
| C12 | C13 | 1.374(5)  | C33 | C31 <sup>2</sup> | 1.378(10) |
| C13 | C15 | 1.489(6)  | C34 | C35              | 1.360(9)  |
| Cu4 | N7  | 1.872(3)  | C34 | C36 <sup>3</sup> | 1.371(9)  |
| Cu4 | N12 | 1.868(3)  | C35 | C36              | 1.391(9)  |
| Cu5 | N8  | 1.868(3)  | C36 | C34 <sup>3</sup> | 1.371(9)  |

<sup>1</sup>-X,-Y,1-Z; <sup>2</sup>1-X,-Y,1-Z; <sup>3</sup>1-X,1-Y,2-Z

**Table S3.** Bond Angles for {[Bz][Cu<sub>3</sub>]<sub>2</sub>]<sub>∞</sub>.

| Atom | Atom | Atom             | Angle/°    | Atom | Atom | Atom | Angle/°    |
|------|------|------------------|------------|------|------|------|------------|
| N1   | Cu1  | Cu2 <sup>1</sup> | 100.16(9)  | N9   | Cu5  | N8   | 172.15(12) |
| N6   | Cu1  | Cu2 <sup>1</sup> | 87.06(8)   | N11  | Cu6  | N10  | 173.84(12) |
| N6   | Cu1  | N1               | 172.78(12) | N8   | N7   | Cu4  | 119.73(19) |
| N2   | Cu2  | Cu1 <sup>1</sup> | 95.88(9)   | C16  | N7   | Cu4  | 132.0(3)   |
| N2   | Cu2  | N3               | 172.16(13) | C16  | N7   | N8   | 107.4(3)   |
| N3   | Cu2  | Cu1 <sup>1</sup> | 91.92(10)  | N7   | N8   | Cu5  | 120.36(19) |
| N4   | Cu3  | N5               | 174.24(13) | C18  | N8   | Cu5  | 131.7(2)   |
| N2   | N1   | Cu1              | 120.0(2)   | C18  | N8   | N7   | 107.3(3)   |



|     |    |     |            |     |     |     |            |
|-----|----|-----|------------|-----|-----|-----|------------|
| C1  | N1 | Cu1 | 132.2(3)   | N10 | N9  | Cu5 | 120.0(2)   |
| C1  | N1 | N2  | 107.3(3)   | N10 | N9  | C21 | 107.2(3)   |
| N1  | N2 | Cu2 | 119.6(2)   | C21 | N9  | Cu5 | 131.9(2)   |
| C3  | N2 | Cu2 | 132.7(3)   | N9  | N10 | Cu6 | 119.64(19) |
| C3  | N2 | N1  | 107.0(3)   | C23 | N10 | Cu6 | 132.0(3)   |
| N4  | N3 | Cu2 | 120.3(2)   | C23 | N10 | N9  | 107.3(3)   |
| C6  | N3 | Cu2 | 131.6(3)   | N12 | N11 | Cu6 | 120.1(2)   |
| C6  | N3 | N4  | 107.2(3)   | C26 | N11 | Cu6 | 131.1(3)   |
| N3  | N4 | Cu3 | 119.7(2)   | C26 | N11 | N12 | 106.7(3)   |
| C8  | N4 | Cu3 | 130.9(3)   | N11 | N12 | Cu4 | 119.5(2)   |
| C8  | N4 | N3  | 107.4(3)   | C28 | N12 | Cu4 | 132.3(3)   |
| N6  | N5 | Cu3 | 119.42(19) | C28 | N12 | N11 | 107.4(3)   |
| C11 | N5 | Cu3 | 131.4(3)   | N7  | C16 | C17 | 110.7(3)   |
| C11 | N5 | N6  | 107.6(3)   | N7  | C16 | C19 | 121.0(4)   |
| N5  | N6 | Cu1 | 120.54(19) | C17 | C16 | C19 | 128.1(3)   |
| C13 | N6 | Cu1 | 131.3(2)   | C16 | C17 | C18 | 104.1(3)   |
| C13 | N6 | N5  | 107.5(3)   | N8  | C18 | C17 | 110.5(3)   |
| N1  | C1 | C2  | 110.5(4)   | N8  | C18 | C20 | 121.0(3)   |
| N1  | C1 | C4  | 121.1(3)   | C17 | C18 | C20 | 128.3(3)   |
| C2  | C1 | C4  | 128.2(4)   | F19 | C19 | C16 | 113.4(3)   |
| C3  | C2 | C1  | 103.7(3)   | F20 | C19 | F19 | 107.4(4)   |
| N2  | C3 | C2  | 111.5(3)   | F20 | C19 | F21 | 107.3(4)   |
| N2  | C3 | C5  | 120.6(4)   | F20 | C19 | C16 | 111.2(4)   |
| C2  | C3 | C5  | 127.9(4)   | F21 | C19 | F19 | 105.0(4)   |
| F1  | C4 | C1  | 112.2(4)   | F21 | C19 | C16 | 112.1(3)   |
| F2  | C4 | F1  | 103.6(4)   | F22 | C20 | F23 | 106.6(5)   |
| F2  | C4 | C1  | 113.6(4)   | F22 | C20 | F24 | 108.9(5)   |
| F3  | C4 | F1  | 107.8(4)   | F22 | C20 | C18 | 111.8(4)   |
| F3  | C4 | F2  | 106.5(5)   | F23 | C20 | C18 | 111.0(4)   |
| F3  | C4 | C1  | 112.5(4)   | F24 | C20 | F23 | 104.4(4)   |
| F4  | C5 | F6  | 106.8(4)   | F24 | C20 | C18 | 113.7(4)   |
| F4  | C5 | C3  | 111.0(4)   | N9  | C21 | C22 | 110.7(3)   |
| F5  | C5 | F4  | 107.6(4)   | N9  | C21 | C24 | 120.9(3)   |
| F5  | C5 | F6  | 106.3(4)   | C22 | C21 | C24 | 128.4(3)   |
| F5  | C5 | C3  | 113.3(3)   | C23 | C22 | C21 | 103.4(3)   |
| F6  | C5 | C3  | 111.5(4)   | N10 | C23 | C22 | 111.4(3)   |
| N3  | C6 | C7  | 111.4(4)   | N10 | C23 | C25 | 120.5(4)   |
| N3  | C6 | C9  | 121.8(4)   | C22 | C23 | C25 | 128.1(3)   |

|     |     |     |           |                  |     |      |           |
|-----|-----|-----|-----------|------------------|-----|------|-----------|
| C7  | C6  | C9  | 126.5(4)  | F25              | C24 | C21  | 113.1(4)  |
| C6  | C7  | C8  | 103.2(4)  | F26              | C24 | F25  | 102.4(4)  |
| N4  | C8  | C7  | 110.7(4)  | F26              | C24 | C21  | 112.6(4)  |
| N4  | C8  | C10 | 121.9(4)  | F27              | C24 | F25  | 106.6(5)  |
| C7  | C8  | C10 | 127.4(4)  | F27              | C24 | F26  | 108.2(4)  |
| F7  | C9  | C6  | 105.3(6)  | F27              | C24 | C21  | 113.1(4)  |
| F8  | C9  | F7  | 98.2(8)   | F28              | C25 | F29  | 104.9(5)  |
| F8  | C9  | C6  | 109.4(5)  | F28              | C25 | C23  | 113.0(4)  |
| F9  | C9  | F7  | 112.3(10) | F29              | C25 | C23  | 112.3(4)  |
| F9  | C9  | F8  | 114.1(11) | F30              | C25 | F28  | 109.4(5)  |
| F9  | C9  | C6  | 115.8(7)  | F30              | C25 | F29  | 102.7(6)  |
| C6  | C9  | F8A | 110.9(5)  | F30              | C25 | C23  | 113.6(4)  |
| F7A | C9  | C6  | 120.4(8)  | N11              | C26 | C27  | 112.0(4)  |
| F7A | C9  | F9A | 110.1(10) | N11              | C26 | C29  | 119.8(4)  |
| F7A | C9  | F8A | 106.9(12) | C27              | C26 | C29  | 128.3(4)  |
| F9A | C9  | C6  | 113.3(6)  | C26              | C27 | C28  | 103.4(4)  |
| F9A | C9  | F8A | 91.2(7)   | N12              | C28 | C27  | 110.6(4)  |
| F10 | C10 | F11 | 101.1(6)  | N12              | C28 | C30  | 121.5(4)  |
| F10 | C10 | C8  | 114.7(5)  | C27              | C28 | C30  | 127.7(4)  |
| F11 | C10 | C8  | 111.4(5)  | F31              | C29 | C26  | 111.6(4)  |
| F12 | C10 | F10 | 112.0(6)  | F32              | C29 | F31  | 105.9(5)  |
| F12 | C10 | F11 | 101.9(6)  | F32              | C29 | C26  | 113.5(4)  |
| F12 | C10 | C8  | 114.1(6)  | F33              | C29 | F31  | 105.7(4)  |
| N5  | C11 | C12 | 110.5(3)  | F33              | C29 | F32  | 107.9(5)  |
| N5  | C11 | C14 | 121.4(3)  | F33              | C29 | C26  | 111.8(4)  |
| C12 | C11 | C14 | 128.1(3)  | F34              | C30 | F36  | 100.5(8)  |
| C13 | C12 | C11 | 103.9(3)  | F34              | C30 | C28  | 112.4(6)  |
| N6  | C13 | C12 | 110.5(3)  | F35              | C30 | F34  | 110.6(8)  |
| N6  | C13 | C15 | 120.7(3)  | F35              | C30 | F36  | 103.0(11) |
| C12 | C13 | C15 | 128.7(3)  | F35              | C30 | C28  | 116.4(8)  |
| F13 | C14 | F14 | 104.9(5)  | F36              | C30 | C28  | 112.4(6)  |
| F13 | C14 | C11 | 112.2(4)  | F34A             | C30 | C28  | 111.8(8)  |
| F14 | C14 | C11 | 112.8(4)  | F34A             | C30 | F35A | 113.1(9)  |
| F15 | C14 | F13 | 108.0(4)  | F34A             | C30 | F36A | 110.7(13) |
| F15 | C14 | F14 | 107.1(5)  | F35A             | C30 | C28  | 110.5(7)  |
| F15 | C14 | C11 | 111.4(4)  | F35A             | C30 | F36A | 99.9(9)   |
| F16 | C15 | C13 | 112.5(3)  | F36A             | C30 | C28  | 110.1(6)  |
| F17 | C15 | F16 | 107.0(4)  | C33 <sup>2</sup> | C31 | C32  | 120.0(7)  |

|     |     |     |            |                  |     |                  |          |
|-----|-----|-----|------------|------------------|-----|------------------|----------|
| F17 | C15 | C13 | 112.1(4)   | C33              | C32 | C31              | 119.3(7) |
| F18 | C15 | F16 | 104.4(4)   | C32              | C33 | C31 <sup>2</sup> | 120.7(7) |
| F18 | C15 | F17 | 107.1(4)   | C35              | C34 | C36 <sup>3</sup> | 121.1(6) |
| F18 | C15 | C13 | 113.2(3)   | C34              | C35 | C36              | 119.2(6) |
| N12 | Cu4 | N7  | 173.12(12) | C34 <sup>3</sup> | C36 | C35              | 119.7(6) |

<sup>1</sup>-X,-Y,1-Z; <sup>2</sup>1-X,-Y,1-Z; <sup>3</sup>1-X,1-Y,2-Z

**Table S4.** Atomic Occupancy for  $\{[\text{Bz}][\text{Cu}_3]_2\}_\infty$ .

| <i>Atom Occupancy</i> |          |
|-----------------------|-----------------------|-----------------------|-----------------------|-----------------------|----------|
| F7                    | 0.487(6)              | F8                    | 0.513(6)              | F9                    | 0.487(6) |
| F34                   | 0.50(2)               | F35                   | 0.50(2)               | F36                   | 0.50(2)  |
| F7A                   | 0.513(6)              | F9A                   | 0.513(6)              | F8A                   | 0.487(6) |
| F34A                  | 0.50(2)               | F35A                  | 0.50(2)               | F36A                  | 0.50(2)  |

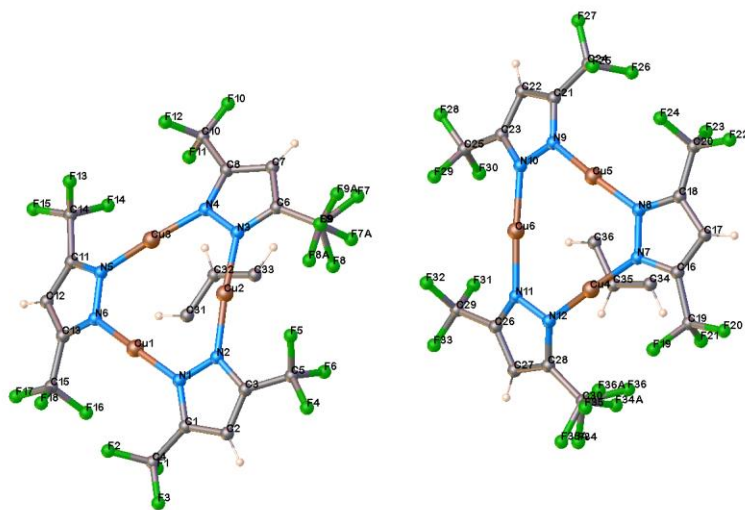

**Figure S3.** View of asymmetric unit and atom labeling of  $\{[\text{Bz}][\text{Cu}_3]_2\}_\infty$

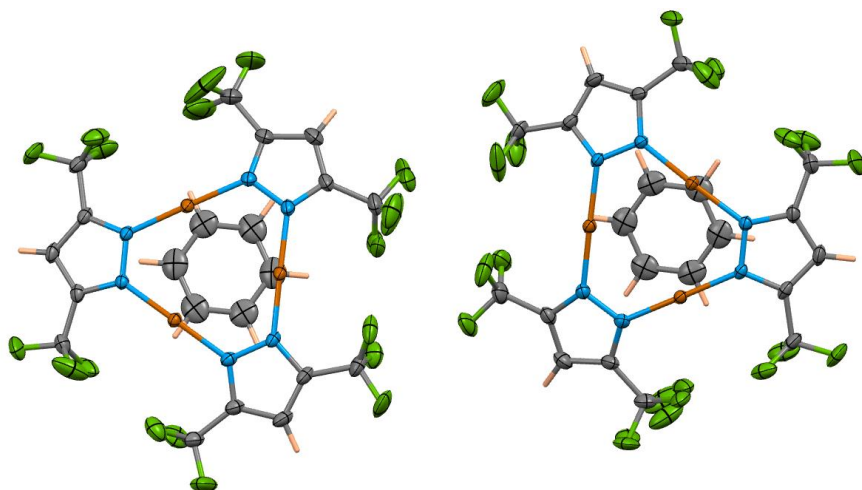

**Figure S4.** View of  $\{[3,5-(\text{CF}_3)_2\text{Pz}]\text{Cu}\}_3$  and benzene in  $\{[\text{Bz}][\text{Cu}_3]_2\}_\infty$

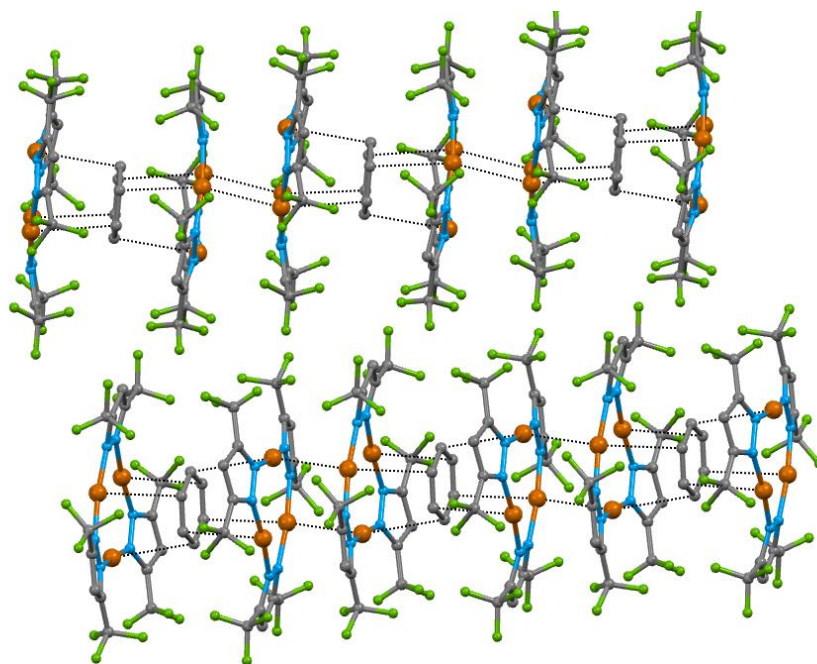

**Figure S5.** View of columnar structure and  $\text{Cu}\cdots\text{Cu}$  interactions of  $\{[\text{Bz}][\text{Cu}_3]_2\}_\infty$

**Table S5.** Crystal data and structure refinement for {[Mes][Cu<sub>3</sub>]}<sub>∞</sub> .

|                                             |                                                                                |
|---------------------------------------------|--------------------------------------------------------------------------------|
| Empirical formula                           | C <sub>24</sub> H <sub>15</sub> Cu <sub>3</sub> F <sub>18</sub> N <sub>6</sub> |
| Formula weight                              | 920.04                                                                         |
| Temperature/K                               | 150.0                                                                          |
| Crystal system                              | trigonal                                                                       |
| Space group                                 | R3c                                                                            |
| a/Å                                         | 19.975(2)                                                                      |
| b/Å                                         | 19.975(2)                                                                      |
| c/Å                                         | 13.2744(14)                                                                    |
| α/°                                         | 90                                                                             |
| β/°                                         | 90                                                                             |
| γ/°                                         | 120                                                                            |
| Volume/Å <sup>3</sup>                       | 4586.8(11)                                                                     |
| Z                                           | 6                                                                              |
| ρ <sub>calc</sub> /g/cm <sup>3</sup>        | 1.998                                                                          |
| μ/mm <sup>-1</sup>                          | 2.207                                                                          |
| F(000)                                      | 2700.0                                                                         |
| Crystal size/mm <sup>3</sup>                | 0.41 × 0.31 × 0.26                                                             |
| Radiation                                   | MoKα (λ = 0.71073)                                                             |
| 2θ range for data collection/°              | 6.948 to 80.536                                                                |
| Index ranges                                | -35 ≤ h ≤ 35, -35 ≤ k ≤ 35, -23 ≤ l ≤ 23                                       |
| Reflections collected                       | 36711                                                                          |
| Independent reflections                     | 6277 [R <sub>int</sub> = 0.0274, R <sub>sigma</sub> = 0.0311]                  |
| Data/restraints/parameters                  | 6277/1/155                                                                     |
| Goodness-of-fit on F <sup>2</sup>           | 1.032                                                                          |
| Final R indexes [I ≥ 2σ (I)]                | R <sub>1</sub> = 0.0275, wR <sub>2</sub> = 0.0634                              |
| Final R indexes [all data]                  | R <sub>1</sub> = 0.0341, wR <sub>2</sub> = 0.0659                              |
| Largest diff. peak/hole / e Å <sup>-3</sup> | 0.45/-0.42                                                                     |

**Table S6.** Bond Lengths for {[Mes][Cu<sub>3</sub>]}<sub>∞</sub> .

| Atom | Atom            | Length/Å   | Atom | Atom            | Length/Å   |
|------|-----------------|------------|------|-----------------|------------|
| Cu   | N1              | 1.8689(13) | N2   | Cu <sup>2</sup> | 1.8720(13) |
| Cu   | N2 <sup>1</sup> | 1.8720(13) | N2   | C3              | 1.346(2)   |
| F1   | C4              | 1.322(3)   | C1   | C2              | 1.387(2)   |
| F2   | C4              | 1.315(2)   | C1   | C4              | 1.489(2)   |
| F3   | C4              | 1.335(3)   | C2   | C3              | 1.383(2)   |

|    |    |            |    |                 |          |
|----|----|------------|----|-----------------|----------|
| F4 | C5 | 1.317(2)   | C3 | C5              | 1.494(2) |
| F5 | C5 | 1.321(3)   | C6 | C7 <sup>1</sup> | 1.392(3) |
| F6 | C5 | 1.324(3)   | C6 | C7              | 1.396(3) |
| N1 | N2 | 1.3554(19) | C6 | C8              | 1.510(3) |
| N1 | C1 | 1.347(2)   | C7 | C6 <sup>2</sup> | 1.392(3) |

<sup>1</sup>1-Y,1+X-Y,+Z; <sup>2</sup>+Y-X,1-X,+Z

**Table S7.** Bond Angles for {[Mes][Cu<sub>3</sub>]}<sub>∞</sub>.

| Atom | Atom | Atom            | Angle/°    | Atom            | Atom | Atom | Angle/°    |
|------|------|-----------------|------------|-----------------|------|------|------------|
| N1   | Cu   | N2 <sup>1</sup> | 178.25(6)  | F1              | C4   | C1   | 112.49(17) |
| N2   | N1   | Cu              | 117.73(10) | F2              | C4   | F1   | 108.2(2)   |
| C1   | N1   | Cu              | 133.18(12) | F2              | C4   | F3   | 106.8(2)   |
| C1   | N1   | N2              | 107.48(13) | F2              | C4   | C1   | 111.61(16) |
| N1   | N2   | Cu <sup>2</sup> | 118.24(10) | F3              | C4   | C1   | 112.51(18) |
| C3   | N2   | Cu <sup>2</sup> | 132.77(11) | F4              | C5   | F5   | 107.7(2)   |
| C3   | N2   | N1              | 107.75(13) | F4              | C5   | F6   | 106.7(2)   |
| N1   | C1   | C2              | 110.80(14) | F4              | C5   | C3   | 111.46(16) |
| N1   | C1   | C4              | 120.86(15) | F5              | C5   | F6   | 106.2(2)   |
| C2   | C1   | C4              | 128.27(15) | F5              | C5   | C3   | 112.00(16) |
| C3   | C2   | C1              | 103.17(13) | F6              | C5   | C3   | 112.45(17) |
| N2   | C3   | C2              | 110.79(14) | C7 <sup>1</sup> | C6   | C7   | 118.64(18) |
| N2   | C3   | C5              | 120.68(14) | C7 <sup>1</sup> | C6   | C8   | 120.6(2)   |
| C2   | C3   | C5              | 128.48(15) | C7              | C6   | C8   | 120.71(19) |
| F1   | C4   | F3              | 104.9(2)   | C6 <sup>2</sup> | C7   | C6   | 121.36(18) |

<sup>1</sup>1-Y,1+X-Y,+Z; <sup>2</sup>+Y-X,1-X,+Z

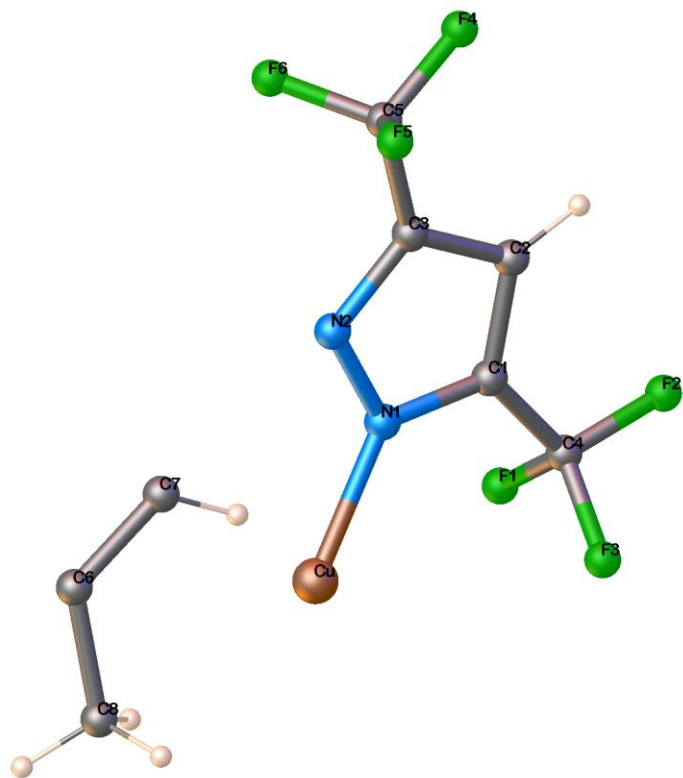

**Figure S6.** View of asymmetric unit and atom labeling of  $\{[\text{Mes}][\text{Cu}_3]\}_\infty$

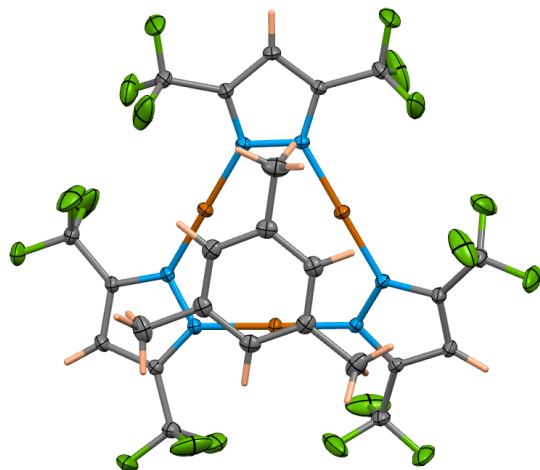

**Figure S7.** View of  $\{[3,5-(\text{CF}_3)_2\text{Pz}]\text{Cu}_3\}$  and mesitylene in  $\{[\text{Mes}][\text{Cu}_3]\}_\infty$

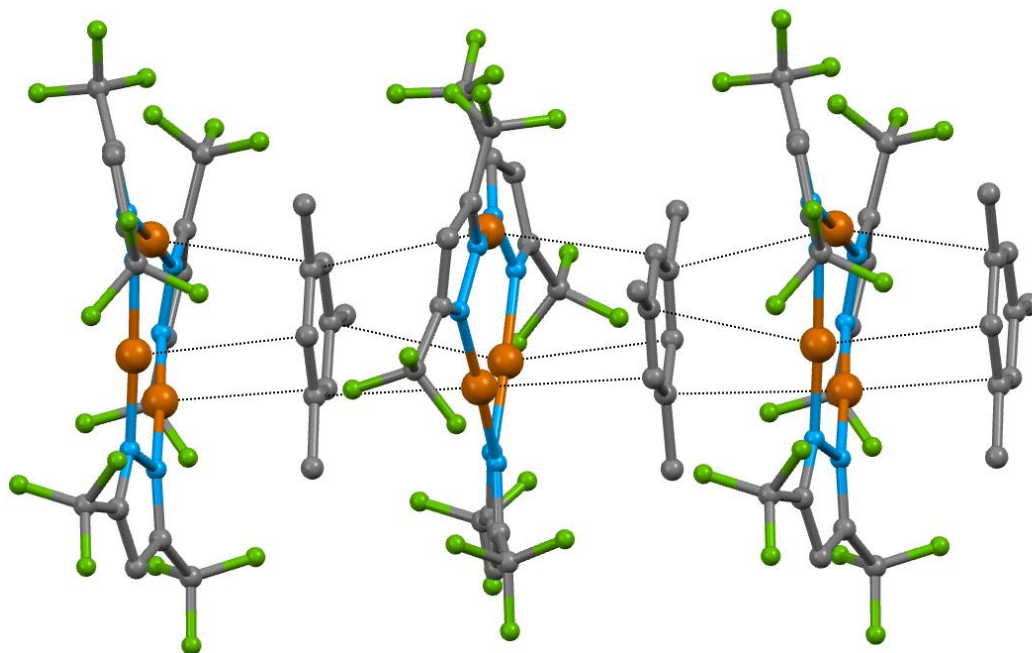

**Figure S8.** View of columnar structure of  $\{[\text{Mes}][\text{Cu}_3]\}_\infty$



**Table S8.** Crystal data and structure refinement for {[Nap][Cu<sub>3</sub>]}<sub>∞</sub>.

|                                             |                                                                                |
|---------------------------------------------|--------------------------------------------------------------------------------|
| Identification code                         | rad194_0m_a_final                                                              |
| Empirical formula                           | C <sub>25</sub> H <sub>11</sub> Cu <sub>3</sub> F <sub>18</sub> N <sub>6</sub> |
| Formula weight                              | 928.02                                                                         |
| Temperature/K                               | 100.0                                                                          |
| Crystal system                              | triclinic                                                                      |
| Space group                                 | P-1                                                                            |
| a/Å                                         | 11.7936(11)                                                                    |
| b/Å                                         | 12.4534(11)                                                                    |
| c/Å                                         | 12.7263(11)                                                                    |
| α/°                                         | 109.803(2)                                                                     |
| β/°                                         | 117.447(2)                                                                     |
| γ/°                                         | 95.807(2)                                                                      |
| Volume/Å <sup>3</sup>                       | 1484.7(2)                                                                      |
| Z                                           | 2                                                                              |
| ρ <sub>calc</sub> /cm <sup>3</sup>          | 2.076                                                                          |
| μ/mm <sup>-1</sup>                          | 2.274                                                                          |
| F(000)                                      | 904.0                                                                          |
| Crystal size/mm <sup>3</sup>                | 0.505 × 0.292 × 0.146                                                          |
| Radiation                                   | MoKα (λ = 0.71073)                                                             |
| 2θ range for data collection/°              | 6.27 to 54                                                                     |
| Index ranges                                | -15 ≤ h ≤ 15, -15 ≤ k ≤ 15, -16 ≤ l ≤ 16                                       |
| Reflections collected                       | 16256                                                                          |
| Independent reflections                     | 6379 [R <sub>int</sub> = 0.0134, R <sub>sigma</sub> = 0.0159]                  |
| Data/restraints/parameters                  | 6379/61/500                                                                    |
| Goodness-of-fit on F <sup>2</sup>           | 1.040                                                                          |
| Final R indexes [I ≥ 2σ (I)]                | R <sub>1</sub> = 0.0223, wR <sub>2</sub> = 0.0569                              |
| Final R indexes [all data]                  | R <sub>1</sub> = 0.0235, wR <sub>2</sub> = 0.0576                              |
| Largest diff. peak/hole / e Å <sup>-3</sup> | 0.43/-0.36                                                                     |

**Table S9.** Bond Lengths for {[Nap][Cu<sub>3</sub>]}<sub>∞</sub>.

| Atom | Atom | Length/Å   | Atom | Atom | Length/Å |
|------|------|------------|------|------|----------|
| Cu1  | N1   | 1.8720(13) | C2   | C3   | 1.383(2) |
| Cu1  | N6   | 1.8719(13) | C3   | C5   | 1.493(2) |
| Cu2  | N2   | 1.8671(13) | C6   | C7   | 1.381(2) |

|     |     |            |     |                  |          |
|-----|-----|------------|-----|------------------|----------|
| Cu2 | N3  | 1.8738(13) | C6  | C9               | 1.502(3) |
| Cu3 | N4  | 1.8770(13) | C6  | C9A              | 1.491(7) |
| Cu3 | N5  | 1.8757(13) | C7  | C8               | 1.384(2) |
| F1  | C4  | 1.3358(18) | C8  | C10              | 1.495(2) |
| F2  | C4  | 1.3441(19) | C9  | F7               | 1.340(3) |
| F3  | C4  | 1.3476(19) | C9  | F8               | 1.329(3) |
| F4  | C5  | 1.3355(19) | C9  | F9               | 1.338(3) |
| F5  | C5  | 1.3440(19) | C9A | F8A              | 1.329(5) |
| F6  | C5  | 1.3351(19) | C9A | F7A              | 1.334(5) |
| F10 | C10 | 1.334(2)   | C9A | F9A              | 1.329(5) |
| F11 | C10 | 1.329(2)   | C11 | C12              | 1.385(2) |
| F12 | C10 | 1.331(2)   | C11 | C14              | 1.491(2) |
| F13 | C14 | 1.337(2)   | C12 | C13              | 1.384(2) |
| F14 | C14 | 1.335(2)   | C13 | C15              | 1.493(2) |
| F15 | C14 | 1.3292(19) | C16 | C17              | 1.371(3) |
| F16 | C15 | 1.3365(19) | C16 | C20 <sup>1</sup> | 1.412(3) |
| F17 | C15 | 1.341(2)   | C17 | C18              | 1.414(3) |
| F18 | C15 | 1.3346(19) | C18 | C19              | 1.372(3) |
| N1  | N2  | 1.3619(17) | C19 | C20              | 1.413(3) |
| N1  | C1  | 1.3451(19) | C20 | C16 <sup>1</sup> | 1.412(3) |
| N2  | C3  | 1.3495(19) | C20 | C20 <sup>1</sup> | 1.438(3) |
| N3  | N4  | 1.3617(18) | C21 | C22              | 1.373(3) |
| N3  | C6  | 1.3493(19) | C21 | C25 <sup>2</sup> | 1.420(3) |
| N4  | C8  | 1.3442(19) | C22 | C23              | 1.406(3) |
| N5  | N6  | 1.3570(17) | C23 | C24              | 1.373(3) |
| N5  | C11 | 1.3462(19) | C24 | C25              | 1.419(3) |
| N6  | C13 | 1.3457(19) | C25 | C21 <sup>2</sup> | 1.420(3) |
| C1  | C2  | 1.385(2)   | C25 | C25 <sup>2</sup> | 1.422(4) |
| C1  | C4  | 1.492(2)   |     |                  |          |

<sup>1</sup>1-X,-Y,1-Z; <sup>2</sup>1-X,1-Y,2-Z

**Table S10** Bond Angles for {[Nap][Cu<sub>3</sub>]}<sub>∞</sub>.

| Atom | Atom | Atom | Angle/°    | Atom | Atom | Atom | Angle/°  |
|------|------|------|------------|------|------|------|----------|
| N6   | Cu1  | N1   | 178.26(5)  | F8   | C9   | C6   | 110.6(2) |
| N2   | Cu2  | N3   | 173.08(6)  | F8   | C9   | F7   | 107.1(3) |
| N5   | Cu3  | N4   | 173.75(6)  | F8   | C9   | F9   | 106.4(2) |
| N2   | N1   | Cu1  | 119.00(10) | F9   | C9   | C6   | 113.7(2) |

|     |    |     |            |                  |     |                  |            |
|-----|----|-----|------------|------------------|-----|------------------|------------|
| C1  | N1 | Cu1 | 133.09(10) | F9               | C9  | F7               | 106.6(2)   |
| C1  | N1 | N2  | 107.38(12) | F8A              | C9A | C6               | 116.2(6)   |
| N1  | N2 | Cu2 | 119.60(10) | F8A              | C9A | F7A              | 108.0(6)   |
| C3  | N2 | Cu2 | 132.75(11) | F8A              | C9A | F9A              | 106.9(6)   |
| C3  | N2 | N1  | 107.43(12) | F7A              | C9A | C6               | 111.1(9)   |
| N4  | N3 | Cu2 | 118.17(10) | F9A              | C9A | C6               | 108.0(5)   |
| C6  | N3 | Cu2 | 132.63(11) | F9A              | C9A | F7A              | 106.1(6)   |
| C6  | N3 | N4  | 107.41(12) | F10              | C10 | C8               | 112.56(15) |
| N3  | N4 | Cu3 | 118.29(10) | F11              | C10 | F10              | 105.77(14) |
| C8  | N4 | Cu3 | 133.46(11) | F11              | C10 | F12              | 107.42(16) |
| C8  | N4 | N3  | 107.47(12) | F11              | C10 | C8               | 110.95(14) |
| N6  | N5 | Cu3 | 119.66(10) | F12              | C10 | F10              | 107.22(16) |
| C11 | N5 | Cu3 | 132.70(11) | F12              | C10 | C8               | 112.54(14) |
| C11 | N5 | N6  | 107.63(12) | N5               | C11 | C12              | 110.84(13) |
| N5  | N6 | Cu1 | 119.86(9)  | N5               | C11 | C14              | 120.80(13) |
| C13 | N6 | Cu1 | 132.68(11) | C12              | C11 | C14              | 128.35(14) |
| C13 | N6 | N5  | 107.45(12) | C13              | C12 | C11              | 103.07(13) |
| N1  | C1 | C2  | 111.16(13) | N6               | C13 | C12              | 111.01(13) |
| N1  | C1 | C4  | 120.15(14) | N6               | C13 | C15              | 121.44(14) |
| C2  | C1 | C4  | 128.69(14) | C12              | C13 | C15              | 127.44(14) |
| C3  | C2 | C1  | 103.08(13) | F13              | C14 | C11              | 112.47(13) |
| N2  | C3 | C2  | 110.95(13) | F14              | C14 | F13              | 105.97(14) |
| N2  | C3 | C5  | 120.73(13) | F14              | C14 | C11              | 112.58(14) |
| C2  | C3 | C5  | 128.30(14) | F15              | C14 | F13              | 106.72(15) |
| F1  | C4 | F2  | 107.69(13) | F15              | C14 | F14              | 107.07(14) |
| F1  | C4 | F3  | 107.07(12) | F15              | C14 | C11              | 111.61(13) |
| F1  | C4 | C1  | 110.96(13) | F16              | C15 | F17              | 105.81(13) |
| F2  | C4 | F3  | 105.89(13) | F16              | C15 | C13              | 112.98(13) |
| F2  | C4 | C1  | 112.62(13) | F17              | C15 | C13              | 112.07(13) |
| F3  | C4 | C1  | 112.28(13) | F18              | C15 | F16              | 107.67(13) |
| F4  | C5 | F5  | 107.14(13) | F18              | C15 | F17              | 106.87(13) |
| F4  | C5 | C3  | 111.02(13) | F18              | C15 | C13              | 111.07(13) |
| F5  | C5 | C3  | 111.75(13) | C17              | C16 | C20 <sup>1</sup> | 121.41(17) |
| F6  | C5 | F4  | 107.07(13) | C16              | C17 | C18              | 120.04(17) |
| F6  | C5 | F5  | 106.29(13) | C19              | C18 | C17              | 119.95(17) |
| F6  | C5 | C3  | 113.22(13) | C18              | C19 | C20              | 121.59(17) |
| N3  | C6 | C7  | 110.85(14) | C16 <sup>1</sup> | C20 | C19              | 122.99(16) |
| N3  | C6 | C9  | 120.45(16) | C16 <sup>1</sup> | C20 | C20 <sup>1</sup> | 118.7(2)   |

|    |    |     |            |                  |     |                  |            |
|----|----|-----|------------|------------------|-----|------------------|------------|
| N3 | C6 | C9A | 123.1(3)   | C19              | C20 | C20 <sup>1</sup> | 118.3(2)   |
| C7 | C6 | C9  | 128.53(16) | C22              | C21 | C25 <sup>2</sup> | 120.47(19) |
| C7 | C6 | C9A | 124.8(3)   | C21              | C22 | C23              | 120.54(18) |
| C6 | C7 | C8  | 103.30(13) | C24              | C23 | C22              | 120.31(19) |
| N4 | C8 | C7  | 110.96(14) | C23              | C24 | C25              | 120.8(2)   |
| N4 | C8 | C10 | 121.92(14) | C21 <sup>2</sup> | C25 | C25 <sup>2</sup> | 119.1(2)   |
| C7 | C8 | C10 | 127.11(14) | C24              | C25 | C21 <sup>2</sup> | 122.09(19) |
| F7 | C9 | C6  | 112.0(3)   | C24              | C25 | C25 <sup>2</sup> | 118.8(2)   |

<sup>1</sup>1-X,-Y,1-Z; <sup>2</sup>1-X,1-Y,2-Z

**Table S11** Atomic Occupancy for {[Nap][Cu<sub>3</sub>]}<sub>∞</sub>.

| <i>Atom Occupancy</i> |          |
|-----------------------|-----------------------|-----------------------|-----------------------|-----------------------|----------|
| C9                    | 0.762(4)              | F7                    | 0.762(4)              | F8                    | 0.762(4) |
| F9                    | 0.762(4)              | C9A                   | 0.238(4)              | F8A                   | 0.238(4) |
| F7A                   | 0.238(4)              | F9A                   | 0.238(4)              |                       |          |

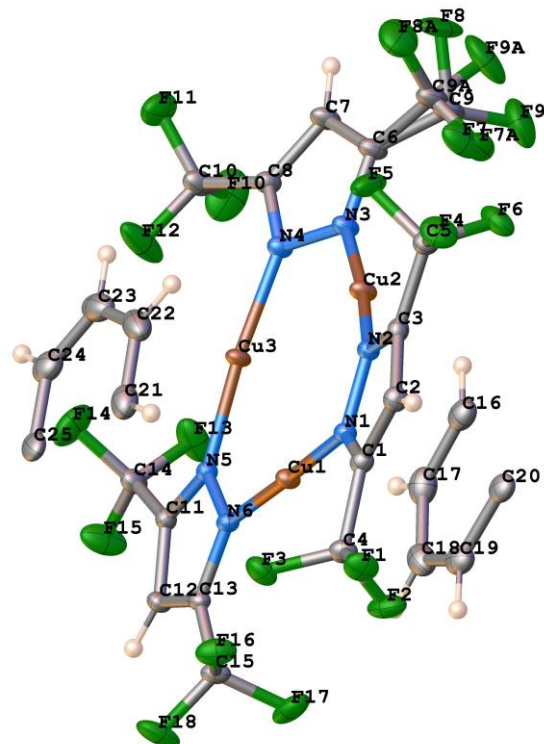

**Figure S9.** View of asymmetric unit and atom labeling of  $\{[\text{Nap}][\text{Cu}_3]\}_\infty$

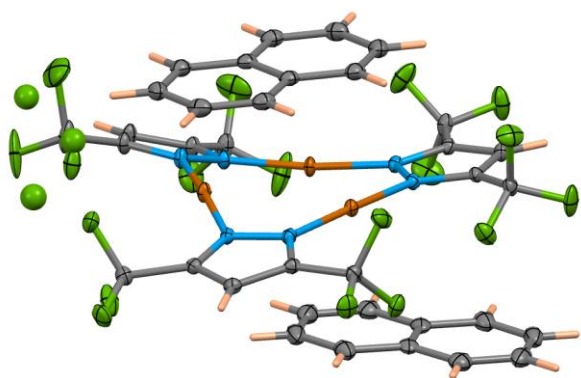

**Figure S10.** View of  $\{[3,5\text{-(CF}_3)_2\text{Pz}]\text{Cu}\}_3$  and naphthalene in  $\{[\text{Nap}][\text{Cu}_3]\}_\infty$

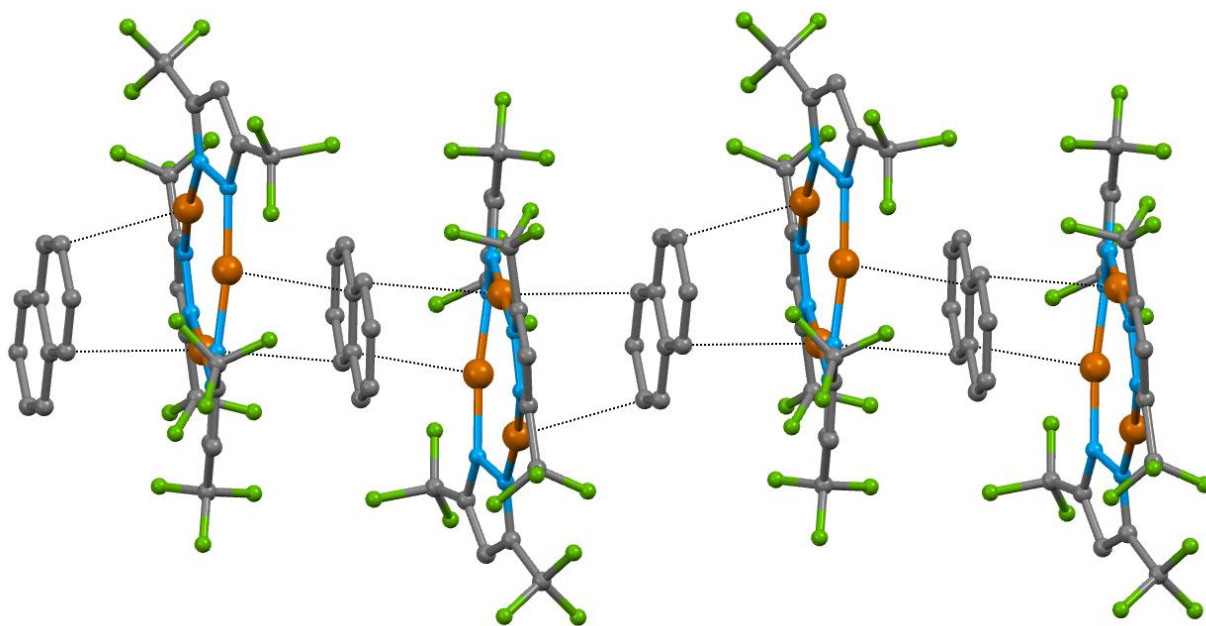

**Figure S11.** View of columnar structure of  $\{[\text{Nap}][\text{Cu}_3]\}_\infty$
